# Supplementary material for: Human blood plasma factors affect the adhesion kinetics of Staphylococcus aureus to central venous catheters
Source: PubMed Central journal article supplement (PMC7710740; doi:10.1038/s41598-020-77168-x), 2020-12-02
Supplement: 41598_2020_77168_MOESM1_ESM.pdf [file 41598_2020_77168_MOESM1_ESM.pdf]

## Supplementary Information

### Human blood plasma factors affect the adhesion kinetics of *Staphylococcus aureus* to central venous catheters

Gubesh Gunaratnam<sup>1</sup>, Christian Spengler<sup>2</sup>, Simone Trautmann<sup>3</sup>, Philipp Jung<sup>1</sup>, Johannes Mischo<sup>2</sup>, Ben Wieland<sup>1</sup>, Carlos Metz<sup>4</sup>, Sören Becker<sup>1</sup>, Matthias Hannig<sup>3</sup>, Karin Jacobs<sup>2,5</sup>, and Markus Bischoff<sup>1\*</sup>

<sup>1</sup>Institute of Medical Microbiology and Hygiene, Saarland University, Homburg, Germany

<sup>2</sup>Experimental Physics, Saarland University, Saarbrücken, Germany

<sup>3</sup>Clinic of Operative Dentistry and Periodontology, Saarland University, Homburg, Germany.

<sup>4</sup>Department of Internal Medicine V, Pneumology and Intensive Care Medicine, Saarland University, Homburg, Germany

<sup>5</sup>Max Planck School Matter to Life, Heidelberg, Germany

#### \*Correspondence:

Dr. Markus Bischoff

[markus.bischoff@uks.eu](mailto:markus.bischoff@uks.eu)

**Table S1: Adhesion forces between *S. aureus* and the naïve tubing of catheter types I-III**

|                          | N315                   |                        | HOM 433               |                        |
|--------------------------|------------------------|------------------------|-----------------------|------------------------|
| Cell No.                 | F <sub>adh</sub> (nN)  | L <sub>rupt</sub> (nm) | F <sub>adh</sub> (nN) | L <sub>rupt</sub> (nm) |
|                          | <b>Catheter type I</b> |                        |                       |                        |
| 1                        | 1.1 ± 0.3              | 229 ± 57               | 3.1 ± 1.2             | 148 ± 37               |
| 2                        | 6.8 ± 3.5              | 212 ± 170              | 2.7 ± 1.8             | 212 ± 36               |
| 3                        | 3.9 ± 1.7              | 150 ± 46               | 5.3 ± 1.2             | 152 ± 27               |
| 4                        | 3.1 ± 1.4              | 88 ± 23                | 3.8 ± 1.2             | 147 ± 24               |
| 5                        | 4.9 ± 3.1              | 176 ± 79               | 4.8 ± 1.8             | 229 ± 56               |
| <b>M±SD</b>              | <b>4.0 ± 2.9</b>       | <b>171 ± 101</b>       | <b>3.6 ± 1.6</b>      | <b>180 ± 53</b>        |
| <b>Catheter type II</b>  |                        |                        |                       |                        |
| 1                        | 1.9 ± 1.2              | 77 ± 38                | 3.6 ± 1.9             | 101 ± 27               |
| 2                        | 2.3 ± 1.6              | 106 ± 39               | 4.6 ± 2.1             | 185 ± 66               |
| 3                        | 5.7 ± 3.3              | 189 ± 62               | 3.8 ± 3.5             | 330 ± 191              |
| 4                        | 3.2 ± 1.1              | 116 ± 49               | 2.4 ± 0.5             | 210 ± 100              |
| 5                        | 2.5 ± 1.6              | 141 ± 40               | 2.8 ± 1.1             | 229 ± 81               |
| <b>M±SD</b>              | <b>3.1 ± 2.3</b>       | <b>125 ± 59*</b>       | <b>3.5 ± 2.2</b>      | <b>211 ± 127</b>       |
| <b>Catheter type III</b> |                        |                        |                       |                        |
| 1                        | 3.9 ± 1.1              | 157 ± 50               | 5.8 ± 1.8             | 229 ± 68               |
| 2                        | 2.6 ± 0.6              | 176 ± 42               | 3.1 ± 1.7             | 225 ± 76               |
| 3                        | 2.3 ± 0.7              | 215 ± 11               | 2.8 ± 1.0             | 180 ± 95               |
| 4                        | 4.0 ± 1.5              | 425 ± 159              | 3.9 ± 1.2             | 1021 ± 156             |
| 5                        | 4.6 ± 1.4              | 176 ± 73               | 1.6 ± 0.5             | 221 ± 46               |
| <b>M±SD</b>              | <b>3.5 ± 1.4</b>       | <b>231 ± 129</b>       | <b>3.5 ± 1.9</b>      | <b>226 ± 79</b>        |

Maximum adhesion force (F<sub>adh</sub>) and rupture length (L<sub>rupt</sub>) measured between single *S. aureus* N315 or HOM 433 bacteria and the naïve tubing surface of catheter types I to III (10 measurements per cell and catheter type recorded on a 10 µm line on the top of the tubing). \*,  $P < 0.05$  between CVC type II and CVC types I and III, respectively (Kruskal-Wallis test followed by Dunn's post hoc test)
